# Supplementary material for: The Versatile Photo-Thermal Behaviour of a 2-Hydroxyazobenzene
Source: MDPI journal article supplement (doi:10.3390/molecules28031183), 2023-01-25
Supplement: s1 [file s1]

# SUPPLEMENTARY MATERIALS

## The versatile photo-thermal behavior of a 2-Hydroxyazobenzene

Pier Luigi Gentili <sup>1,\*</sup>, Antonio Capaccioni <sup>1</sup>, Raimondo Germani <sup>1</sup> and Simona Fantacci <sup>2</sup>

<sup>1</sup>Department of Chemistry, Biology and Biotechnology, Università degli Studi di Perugia, 06123 Perugia , Italy

<sup>2</sup>Istituto CNR di Scienze e Tecnologie Chimiche "Giulio Natta" (CNR-SCITEC), 06123 Perugia , Italy

\*Correspondence: pierluigi.gentili@unipg.it; Tel.: +39 0755855573

### Index

| Paragraph  | Title                                                                                                               | Page |
|------------|---------------------------------------------------------------------------------------------------------------------|------|
| <b>1</b>   | <b>Transformation of <i>t</i>-DZH into <i>t</i>-DZ after the addition of a strong base</b>                          | 3    |
|            | Figure S1                                                                                                           | 3    |
|            | Figure S2                                                                                                           | 3    |
|            | Figure S3                                                                                                           | 4    |
| <b>2</b>   | <b>Simulated Absorption spectra</b>                                                                                 | 4    |
|            | Figure S4                                                                                                           | 4    |
| <b>3</b>   | <b>Transmittance spectra of <i>t</i>-DZH and <i>t</i>-DZ and their colour coordinates values in the three media</b> | 5    |
|            | Figure S5                                                                                                           | 5    |
|            | Figure S6                                                                                                           | 5    |
|            | Figure S7                                                                                                           | 6    |
|            | Table S1                                                                                                            | 6    |
| <b>4</b>   | <b>Photochemical experiments</b>                                                                                    | 7    |
|            | Figure S8: UG1 Filter                                                                                               | 7    |
|            | Figure S9: Absorption spectra of the actinometer                                                                    | 7    |
| <b>4.1</b> | <b><i>Trans-to-cis</i> photoisomerization for <i>t</i>-DZH in SB3-14</b>                                            | 8    |
|            | Table S2                                                                                                            | 8    |
| <b>4.2</b> | <b><i>Trans-to-cis</i> photoisomerization for <i>t</i>-DZH in H<sub>2</sub>O/CH<sub>3</sub>CN=1/1</b>               | 8    |
|            | Figure S10                                                                                                          | 8    |

|     |                                                                                        |    |
|-----|----------------------------------------------------------------------------------------|----|
|     | Table S3                                                                               | 8  |
| 4.3 | <i>Trans-to-cis photoisomerization for t-DZH in CH<sub>3</sub>CN</i>                   | 9  |
|     | Figure S11                                                                             | 9  |
|     | Table S4                                                                               | 9  |
| 4.4 | <i>Trans-to-cis photoisomerization for t-DZ in SB3-14</i>                              | 9  |
|     | Table S5                                                                               | 9  |
| 4.5 | <i>Trans-to-cis photoisomerization for t-DZ in H<sub>2</sub>O/CH<sub>3</sub>CN=1/1</i> | 10 |
|     | Figure S12                                                                             | 10 |
|     | Table S6                                                                               | 10 |
| 4.6 | <i>Trans-to-cis photoisomerization for t-DZ in CH<sub>3</sub>CN</i>                    | 11 |
|     | Figure S13                                                                             | 11 |
|     | Table S7                                                                               | 11 |
|     | Table S8: kinetic constants for the photochemical reactions                            | 12 |
| 5   | <b>Optimized molecular structures through DFT calculations</b>                         | 12 |
|     | Figure S14                                                                             | 12 |
|     | Table S9                                                                               | 13 |
|     | Atomic coordinates of the <i>trans</i> and <i>cis</i> isomers                          | 13 |
|     | Figure S15                                                                             | 16 |
| 6   | <b>Photo-induce ΔpH</b>                                                                | 17 |
|     | Figure S16                                                                             | 17 |
|     | Figure S17                                                                             | 18 |

### 1. Transformation of *t*-DZH into *t*-DZ after the addition of a strong base.

*t*-DZH at a concentration of  $5 \times 10^{-5}$  M in acetonitrile was completely deprotonated after successive addition of the strong organic base 1,8-diazabicyclo[5.4.0]undec-7-ene (DBU). The spectral evolution is reported in Figure S1. The final spectrum was recorded for a concentration of DBU 11 times larger than that of *t*-DZH.

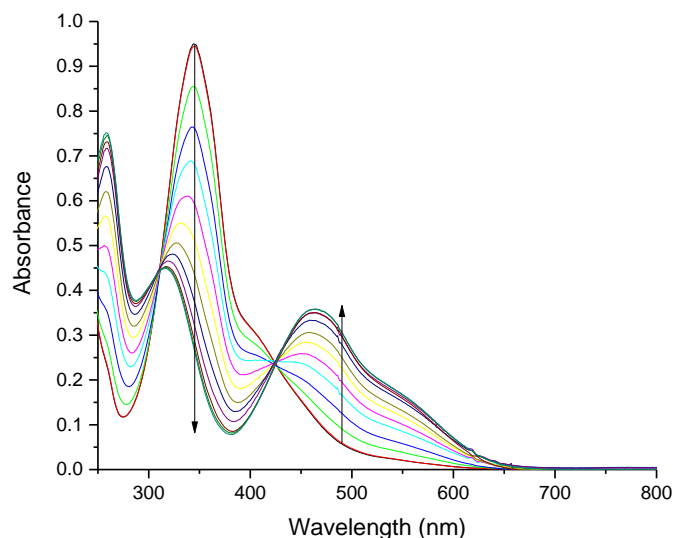

**Figure S1.** Spectral evolution of a *t*-DZH solution in acetonitrile after successive addition of DBU. The final spectrum was recorded for a ratio  $\left(\frac{[DBU]}{[t-DZH]}\right) = 11$ .

*t*-DZH at a concentration of  $5 \times 10^{-5}$  M in an aqueous solution of SB3-14 at 0.1 M was completely deprotonated after successive addition of NaOH. The spectral evolution is shown in Figure S2. The final spectrum was recorded for a concentration of NaOH 36 times larger than that of *t*-DZH.

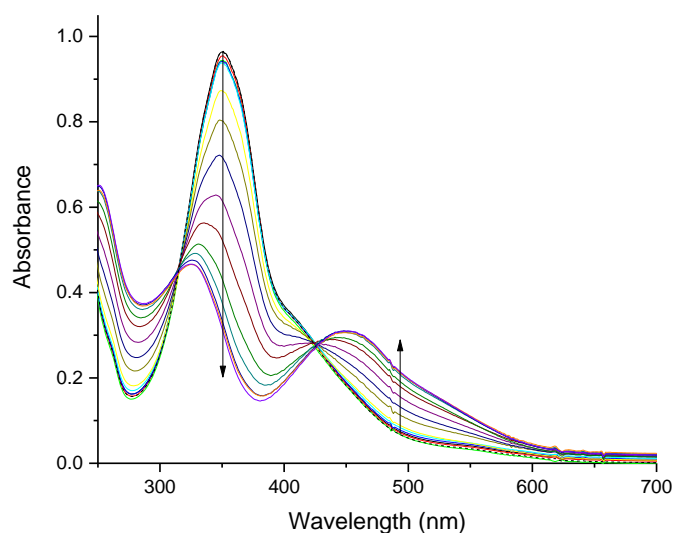

**Figure S2.** Spectral evolution of a *t*-DZH solution in  $[SB3-14]_{aq}=0.1$  M after successive addition of NaOH. The final spectrum was recorded for a ratio  $\left(\frac{[NaOH]}{[t-DZH]}\right) = 36$ .

*t*-DZH at a concentration of  $5 \times 10^{-5}$  M in a mixture of water/acetonitrile=1/1 was completely deprotonated after a few additions of a concentrated solution of NaOH. The spectral evolution is reported in Figure S3. The final spectrum was recorded for a concentration of NaOH 12 times larger than that of *t*-DZH.

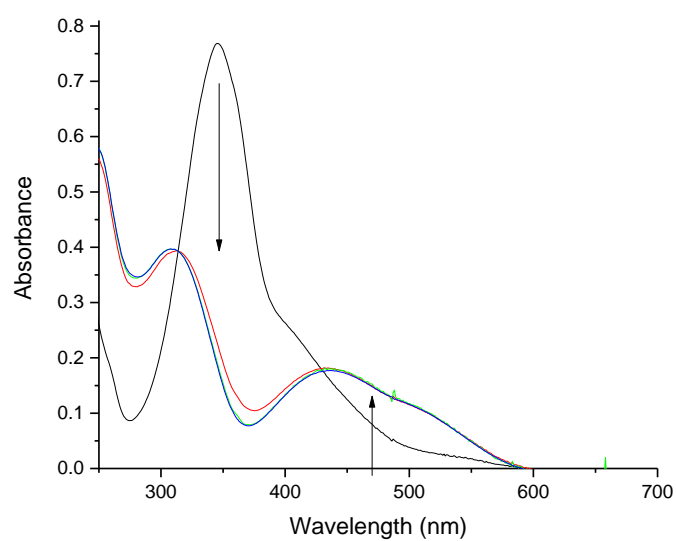

**Figure S3.** Spectral evolution of a *t*-DZH solution in a mixture of water/acetonitrile=1/1 after a few additions of a concentrated solution of NaOH. The final spectrum was recorded for a ratio  $\left(\frac{[NaOH]}{[t-DZH]}\right) = 12$ .

## 2. Quantum-mechanical simulations

Simulated absorption spectra of *t*-DZH and *t*-DZ.

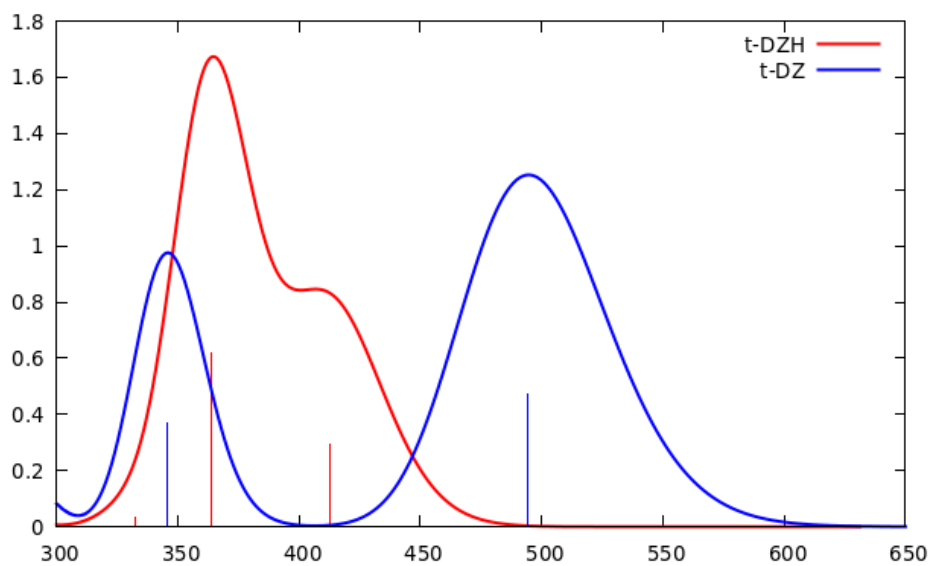

**Figure S4.** Simulated absorption spectra of *t*-DZH (red line) and *t*-DZ (blue line).

3. Transmittance spectra of *t*-DZH and *t*-DZ and their colour coordinates values in the three media

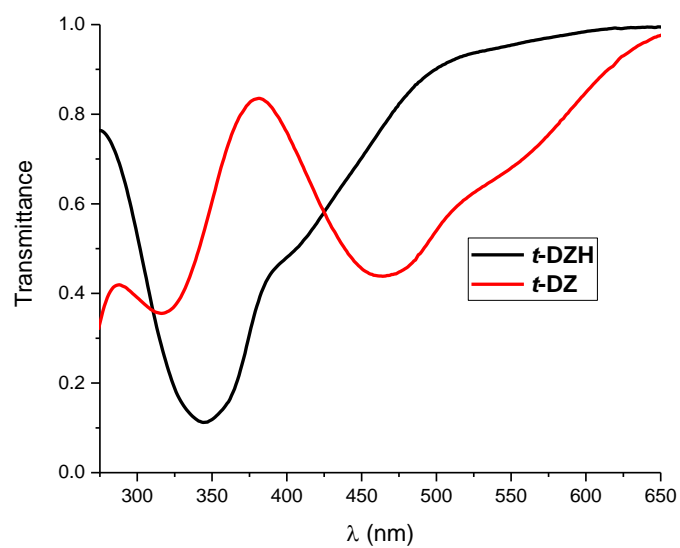

Figure S5. Transmittance spectra of *t*-DZH and *t*-DZ in acetonitrile.

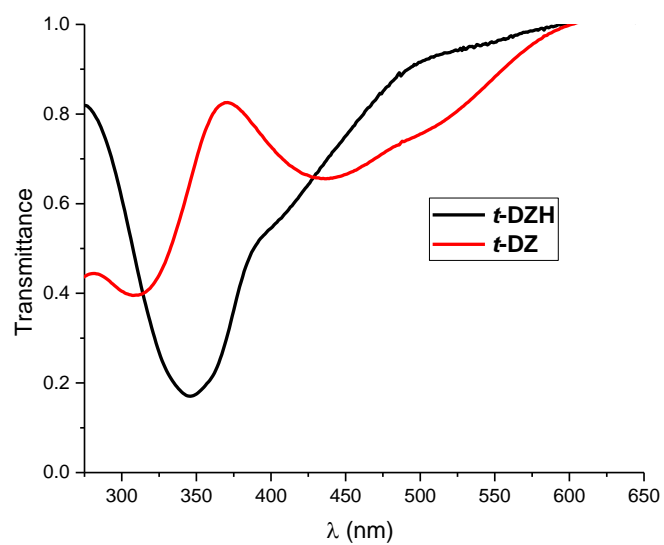

Figure S6. Transmittance spectra of *t*-DZH and *t*-DZ in water/acetonitrile=1/1.

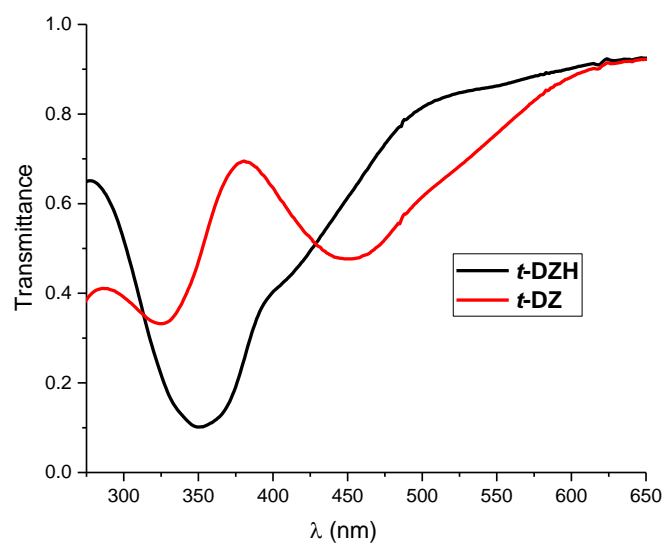

**Figure S7.** Transmittance spectra of *t*-DZH and *t*-DZ in [SB3-14]<sub>aq</sub>=0.1 M

**Table S1.** The CIE XYZ tristimulus and RGB values generated by *t*-DZH and *t*-DZ dissolved in the three media at the spectrophotometric concentrations of  $5 \times 10^{-5}$  M.

| Medium                                  | <i>t</i> -DZH |       |       |     |     |     | <i>t</i> -DZ |       |       |     |     |     |
|-----------------------------------------|---------------|-------|-------|-----|-----|-----|--------------|-------|-------|-----|-----|-----|
|                                         | X             | Y     | Z     | R   | G   | B   | X            | Y     | Z     | R   | G   | B   |
| CH <sub>3</sub> CN                      | 0.873         | 0.940 | 0.763 | 255 | 242 | 169 | 0.713        | 0.694 | 0.530 | 250 | 161 | 117 |
| H <sub>2</sub> O/CH <sub>3</sub> CN=1/1 | 0.895         | 0.955 | 0.811 | 255 | 244 | 182 | 0.862        | 0.879 | 0.732 | 255 | 215 | 164 |
| SB3-14 (0.1 M)                          | 0.794         | 0.854 | 0.668 | 236 | 219 | 147 | 0.741        | 0.751 | 0.546 | 249 | 182 | 119 |

#### 4. Photochemical experiments.

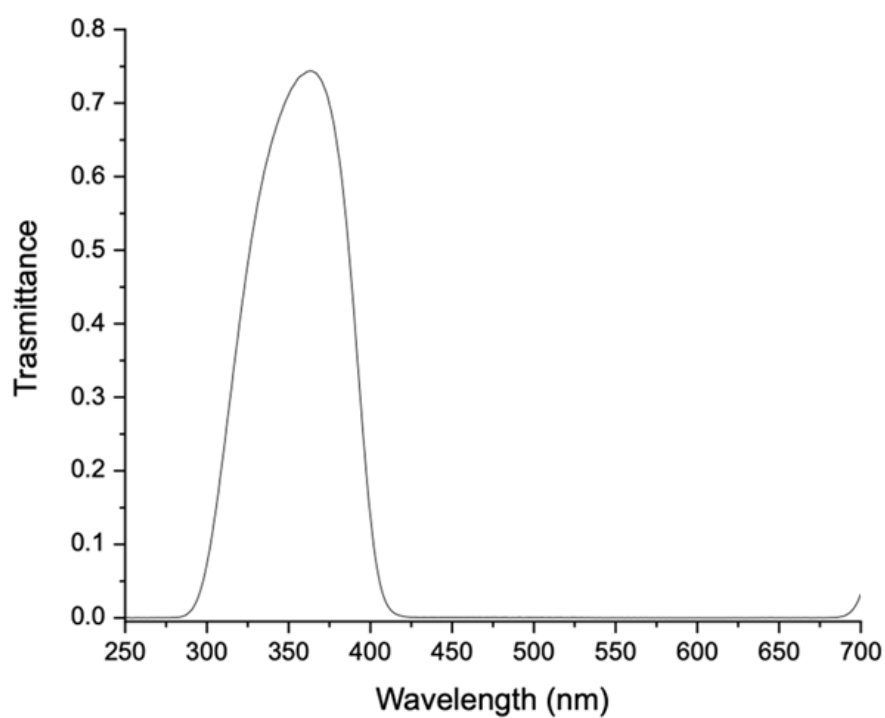

**Figure S8.** Transmittance spectrum of the UG1 filter.

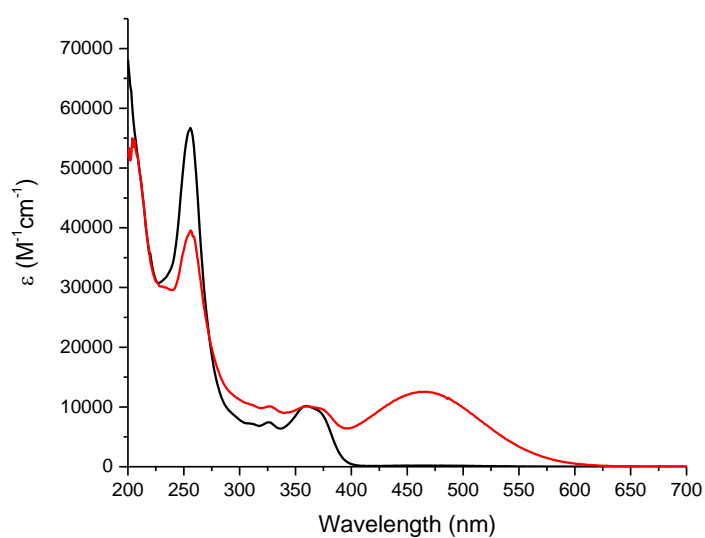

**Figure S9.** Absorption spectra of the uncolored (black trace) and colored (red trace) forms of the photochromic PHT used as an actinometer.

#### 4.1 Trans-to-cis photoisomerization for *t*-DZH in SB3-14

**Table S2.** Chromaticity coordinates and respective colours generated by *t*-DZH before irradiation and at the photo-stationary state when dissolved in the micellar solution of SB3-14 (0.1 M) and at the spectrophotometric concentration of  $4.2 \times 10^{-5}$  M.

|                | Initial Spectrum |       |       |        | Ph.-station. State Spectrum |       |       |        | <i>C</i><br>(10 <sup>-3</sup> ) |
|----------------|------------------|-------|-------|--------|-----------------------------|-------|-------|--------|---------------------------------|
|                | x                | y     | z     | colour | x                           | y     | z     | colour |                                 |
| SB3-14 (0.1 M) | 0.339            | 0.363 | 0.297 |        | 0.335                       | 0.357 | 0.308 |        | -2.3                            |

#### 4.2 Trans-to-cis photoisomerization for *t*-DZH in H<sub>2</sub>O/CH<sub>3</sub>CN=1/1

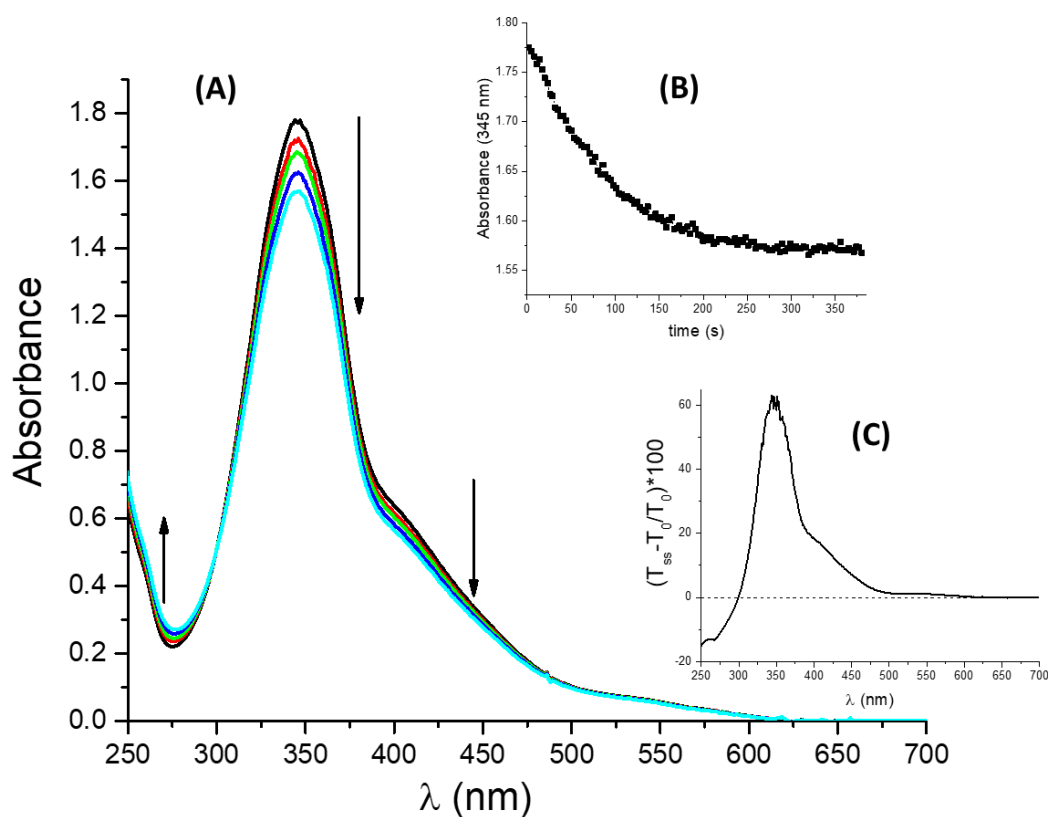

**Figure S10.** Spectral modifications (A) induced by a steady UV irradiation at  $\lambda_{irr} = (363 \pm 40) \text{ nm}$  for [*t*-DZH] =  $1.0 \times 10^{-4}$  M in H<sub>2</sub>O/ CH<sub>3</sub>CN=1/1: the arrows indicate the trends of absorbance in the different spectral regions (the black and cyan traces are the initial and final spectra, recorded before irradiation and at the photo-stationary state, respectively). Graph B shows how the absorbance at 345 nm changes upon UV irradiation. Graph C reports the trend of the relative percentage transmittance change, defined in equation (3), as the function of wavelength.

**Table S3.** Chromaticity coordinates and respective colours generated by *t*-DZH before irradiation and at the photo-stationary state when dissolved in H<sub>2</sub>O/ CH<sub>3</sub>CN=1/1 at the spectrophotometric concentration of  $1.0 \times 10^{-4}$  M.

|                    | Initial Spectrum |       |       |        | Ph.-station. State Spectrum |       |       |        | <i>C</i><br>(10 <sup>-3</sup> ) |
|--------------------|------------------|-------|-------|--------|-----------------------------|-------|-------|--------|---------------------------------|
|                    | x                | y     | z     | colour | x                           | y     | z     | colour |                                 |
| CH <sub>3</sub> CN | 0.364            | 0.390 | 0.246 |        | 0.360                       | 0.385 | 0.256 |        | -5.8                            |



### 4.3 Trans-to-cis photoisomerization for *t*-DZH in CH<sub>3</sub>CN

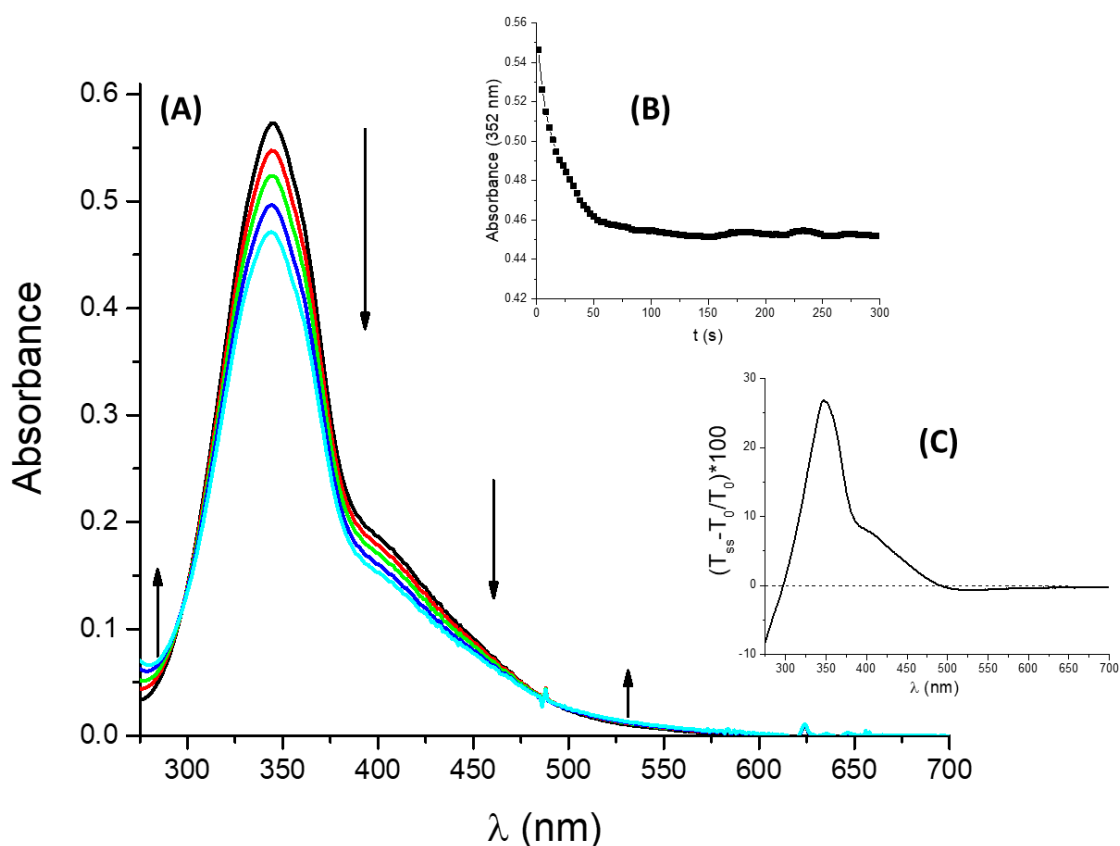

**Figure S11.** Spectral modifications (A) induced by a steady UV irradiation at  $\lambda_{irr} = (363 \pm 40) \text{ nm}$  for  $[t\text{-DZH}] = 3.2 \times 10^{-5} \text{ M}$  in  $\text{CH}_3\text{CN}$ : the arrows indicate the trends of absorbance in the different spectral regions (the black and cyan traces are the initial and final spectra, recorded before irradiation and at the photo-stationary state, respectively). Graph B shows how the absorbance at 352 nm changes upon UV irradiation. Graph C reports the trend of the relative percentage transmittance change, defined in equation (3), as the function of wavelength.

**Table S4.** Chromaticity coordinates and respective colours generated by *t*-DZH before irradiation and at the photo-stationary state when dissolved in acetonitrile at the spectrophotometric concentration of  $3.2 \times 10^{-5} \text{ M}$ .

|                    | <i>Initial Spectrum</i> |       |       |        | <i>Steady-state Spectrum</i> |       |       |        | <i>C</i><br>( $10^{-3}$ ) |
|--------------------|-------------------------|-------|-------|--------|------------------------------|-------|-------|--------|---------------------------|
|                    | x                       | y     | z     | colour | x                            | y     | z     | colour |                           |
| CH <sub>3</sub> CN | 0.329                   | 0.353 | 0.318 |        | 0.323                        | 0.356 | 0.321 |        | 0.3                       |

### 4.4 Trans-to-cis photoisomerization for *t*-DZ in SB3-14

**Table S5.** Chromaticity coordinates and respective colours generated by *t*-DZ before irradiation and at the photo-stationary state when dissolved in the micellar solution of SB3-14 (0.1 M) and at the spectrophotometric concentration of  $4.8 \times 10^{-5} \text{ M}$ .

|                | <i>Initial Spectrum</i> |       |       |        | <i>Ph.-station. State Spectrum</i> |       |       |        | <i>C</i><br>( $10^{-3}$ ) |
|----------------|-------------------------|-------|-------|--------|------------------------------------|-------|-------|--------|---------------------------|
|                | x                       | y     | z     | colour | x                                  | y     | z     | colour |                           |
| SB3-14 (0.1 M) | 0.361                   | 0.368 | 0.271 |        | 0.344                              | 0.354 | 0.302 |        | -9.8                      |

#### 4.5 Trans-to-cis photoisomerization for *t*-DZ in H<sub>2</sub>O/CH<sub>3</sub>CN=1/1

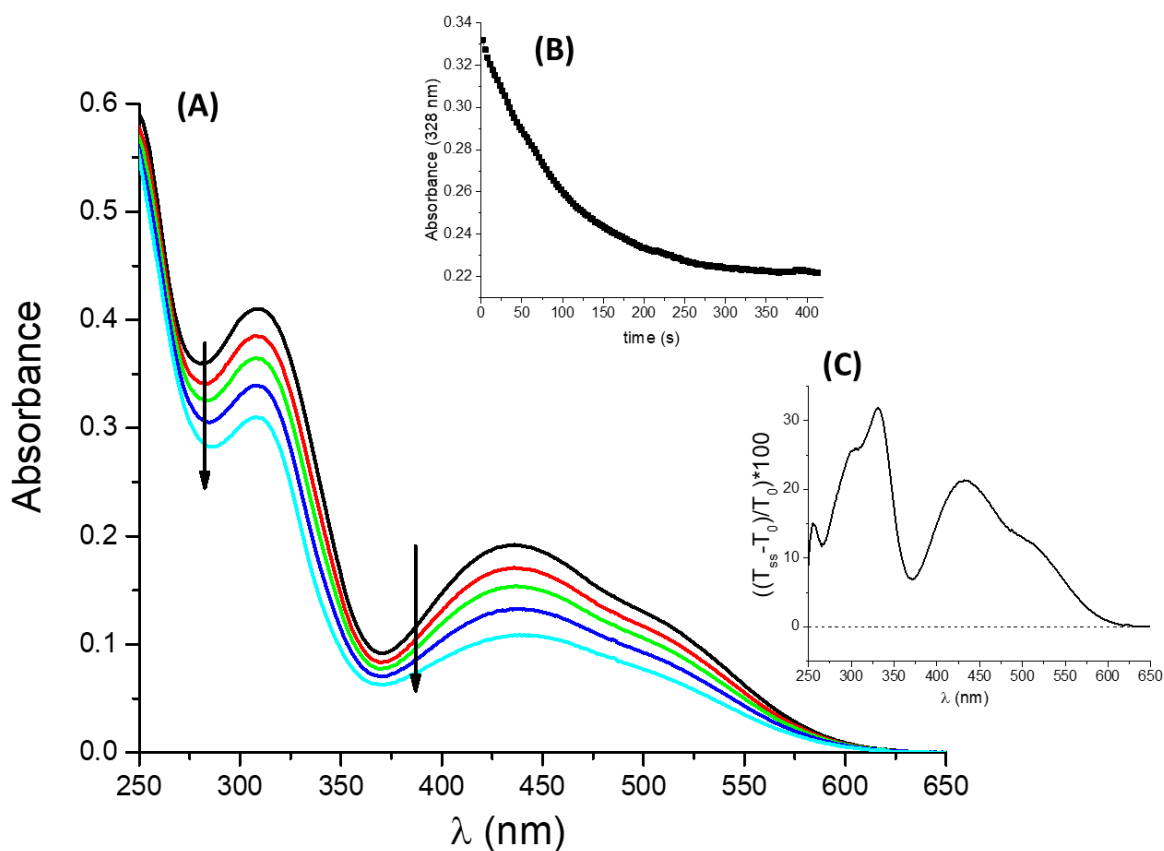

**Figure S12.** Spectral modifications (A) induced by a steady UV irradiation at  $\lambda_{irr} = (363 \pm 40)nm$  for  $[t\text{-DZ}] = 5 \times 10^{-5}M$  in H<sub>2</sub>O/CH<sub>3</sub>CN=1/1: the arrows indicate the trends of absorbance in the different spectral regions (the black and cyan traces are the initial and final spectra, recorded before irradiation and at the photo-stationary state, respectively). Graph B shows how the absorbance at 328 nm changes upon UV irradiation. Graph C reports the trend of the relative percentage transmittance change, defined in equation (3), as the function of wavelength.

**Table S6.** Chromaticity coordinates and respective colours generated by *t*-DZ before irradiation and at the photo-stationary state when dissolved in H<sub>2</sub>O/ CH<sub>3</sub>CN=1/1 at the spectrophotometric concentration of  $5.0 \times 10^{-5}M$ .

|                    | Initial Spectrum |       |       |        | Ph.-station. State Spectrum |       |       |        | <i>C</i><br>(10 <sup>-3</sup> ) |
|--------------------|------------------|-------|-------|--------|-----------------------------|-------|-------|--------|---------------------------------|
|                    | x                | y     | z     | colour | x                           | y     | z     | colour |                                 |
| CH <sub>3</sub> CN | 0.349            | 0.355 | 0.296 |        | 0.334                       | 0.345 | 0.321 |        | -4.0                            |

#### 4.6 Trans-to-cis photoisomerization for *t*-DZ in CH<sub>3</sub>CN

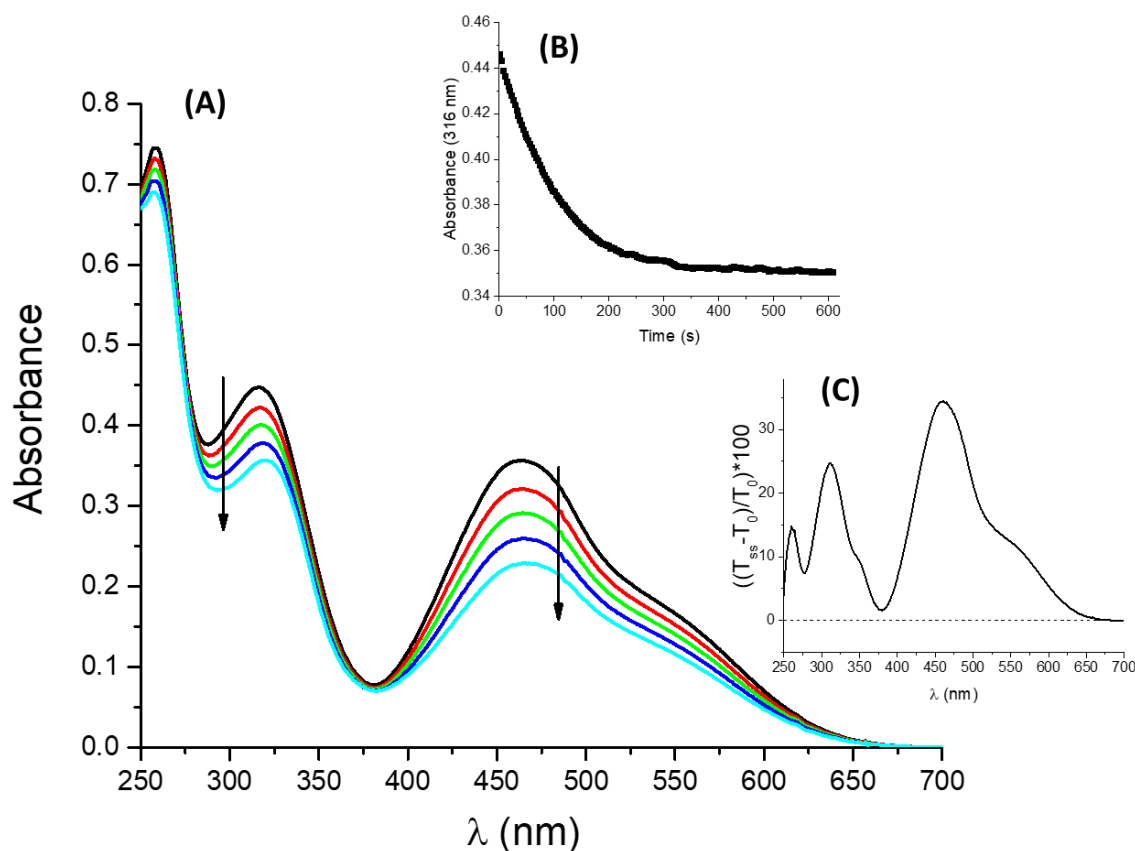

**Figure S13.** Spectral modifications (A) induced by a steady UV irradiation at  $\lambda_{irr} = (363 \pm 40) \text{ nm}$  for  $[t\text{-DZ}] = 5 \times 10^{-5} \text{ M}$  in CH<sub>3</sub>CN: the arrows indicate the trends of absorbance in the different spectral regions (the black and cyan traces are the initial and final spectra, recorded before irradiation and at the photo-stationary state, respectively). Graph B shows how the absorbance at 316 nm changes upon UV irradiation. Graph C reports the trend of the relative percentage transmittance change, defined in equation (3), as the function of wavelength.

**Table S7.** Chromaticity coordinates and respective colours generated by *t*-DZ before irradiation and at the photo-stationary state when dissolved in CH<sub>3</sub>CN at the spectrophotometric concentration of  $5.0 \times 10^{-5} \text{ M}$ .

|                    | Initial Spectrum |       |       |        | Ph.-station. State Spectrum |       |       |        | $C$<br>( $10^{-3}$ ) |
|--------------------|------------------|-------|-------|--------|-----------------------------|-------|-------|--------|----------------------|
|                    | x                | y     | z     | colour | x                           | y     | z     | colour |                      |
| CH <sub>3</sub> CN | 0.368            | 0.358 | 0.274 |        | 0.349                       | 0.347 | 0.304 |        | -9.1                 |

**Table S8.** Kinetic constant values  $k(\text{s}^{-1})$  for the photochemical conversion of trans to cis determined by fitting the  $\Delta A$  changes vs. time through the following function:  $\Delta A = A_{\infty} + A'e^{-\frac{t}{k}}$ .

|               | SB3-14 | H <sub>2</sub> O/CH <sub>3</sub> CN=1/1 | CH <sub>3</sub> CN |
|---------------|--------|-----------------------------------------|--------------------|
| <i>t</i> -DZH | 0.018  | 0.012                                   | 0.045              |
| <i>t</i> -DZ  | 0.0077 | 0.010                                   | 0.010              |

## 5. Optimized molecular structures through DFT calculations

In the attempt to determine the most stable structure for *c*-DZH, distinct conformers with slightly different potential energies (within 1 kcal/mol) have been found. Three conformers are shown in Figure S14, starting from the most stable one (*c*-DZH\_0). Its energy has been fixed as the reference for determining the relative energies of the other two conformers (*c*-DZH\_1 and *c*-DZH\_2).

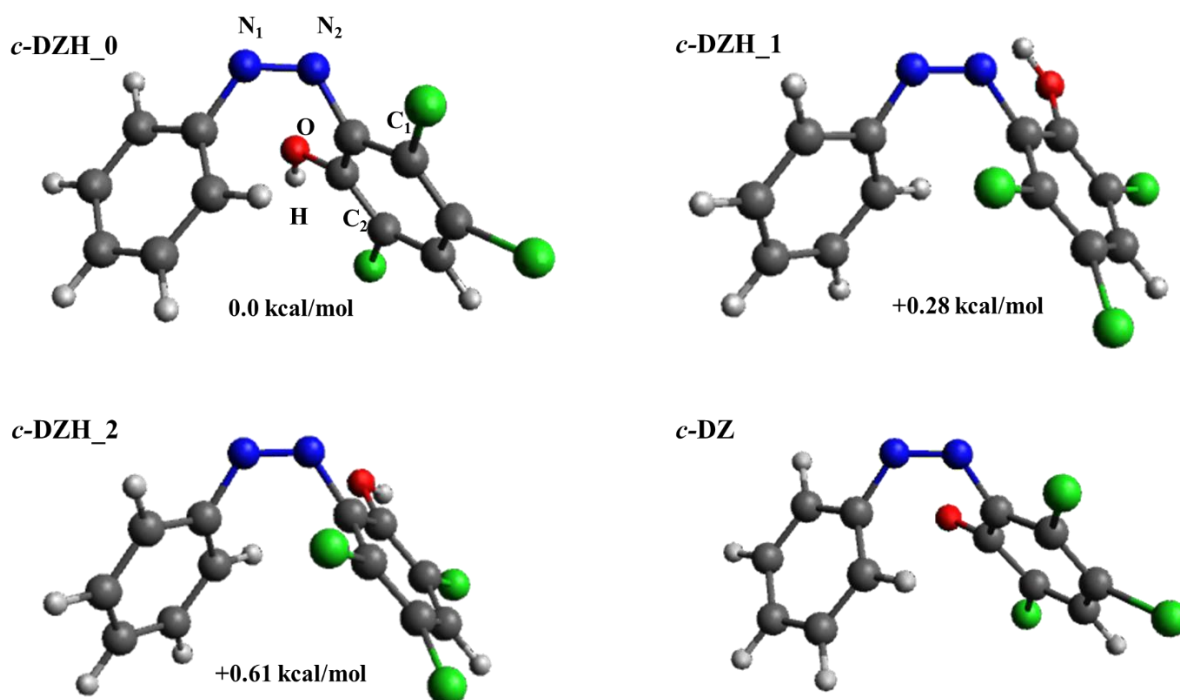

**Figure S14.** Structures of three among the most stable conformers of *c*-DZH: *c*-DZH\_0, which is the most stable, *c*-DZH\_1, and *c*-DZH\_2. C-DZ is the most stable conformer of its conjugated base.

Table S9 reports the optimized distances of some bonds that play a relevant role in the photochromism of the *o*-hydroxyazobenzene.

**Table S9.** Optimized distances for some bonds of *c*-DZH and *c*-DZ conformers depicted in Figure S14.

| Optimized bond distances (Å)  | <i>c</i> -DZH_0 | <i>c</i> -DZH_1 | <i>c</i> -DZH_2 | <i>c</i> -DZ |
|-------------------------------|-----------------|-----------------|-----------------|--------------|
| N <sub>1</sub> N <sub>2</sub> | 1.244           | 1.248           | 1.241           | 1.252        |
| N <sub>2</sub> C <sub>1</sub> | 1.439           | 1.434           | 1.444           | 1.419        |
| C <sub>1</sub> C <sub>2</sub> | 1.403           | 1.406           | 1.400           | 1.457        |
| C <sub>2</sub> O              | 1.349           | 1.350           | 1.352           | 1.260        |
| OH                            | 0.969           | 0.971           | 0.969           | —            |

**Atomic coordinates of the optimized molecular structures:**

***t*-DZH**

```

C      -0.127878  0.000015  0.301430
C      0.093534 -0.000001  1.699933
C      1.404878 -0.000017  2.181430
C      2.492630 -0.000018  1.310309
C      2.286881 -0.000002 -0.057454
C      0.991386  0.000014 -0.576643
Cl     -1.217395 -0.000001  2.842306
Cl      1.751093 -0.000037  3.899227
H      3.498307 -0.000031  1.707185
Cl      3.653430 -0.000003 -1.147081
O       0.808510  0.000029 -1.905594
N     -1.323061  0.000034 -0.435777
H     -0.159497  0.000039 -2.042469
N     -2.428480  0.000037  0.157051
C     -3.574850  0.000016 -0.671755
C     -4.795690  0.000019  0.017294
C     -5.996801  0.000000 -0.686035
C     -5.983845 -0.000021 -2.080193
C     -4.765940 -0.000023 -2.770787
C     -3.563980 -0.000005 -2.077089
H     -4.780972  0.000035  1.100639
H     -6.937989  0.000002 -0.149251
H     -6.916862 -0.000035 -2.631789
H     -4.760281 -0.000039 -3.854644
H     -2.624816 -0.000006 -2.612815

```

***t*-DZ**

```

C     -0.120266  0.000008  0.337134
C      0.112346  0.000018  1.724003
C      1.432996  0.000010  2.196027
C      2.503904 -0.000008  1.305127
C      2.268673 -0.000018 -0.069821
C      0.952943 -0.000010 -0.546125
N     -0.895275  0.000037  2.724392
N     -2.076945  0.000042  2.271385
C     -3.170738  0.000060  3.118713

```

|    |           |           |           |
|----|-----------|-----------|-----------|
| C  | -3.192729 | 0.000065  | 4.545973  |
| C  | -4.396027 | 0.000088  | 5.235117  |
| C  | -5.618912 | 0.000107  | 4.542216  |
| C  | -5.633849 | 0.000101  | 3.175565  |
| C  | -4.438299 | 0.000075  | 2.357910  |
| Cl | -1.720232 | 0.000039  | 5.505807  |
| Cl | -4.483914 | 0.000094  | 6.996476  |
| Cl | -7.188613 | 0.000126  | 2.343514  |
| O  | -4.495114 | 0.000069  | 1.107049  |
| H  | -6.544422 | 0.000126  | 5.102754  |
| H  | 1.601272  | 0.000018  | 3.266968  |
| H  | 3.519942  | -0.000015 | 1.683676  |
| H  | 3.099629  | -0.000032 | -0.766087 |
| H  | 0.767204  | -0.000018 | -1.614831 |
| H  | -1.138546 | 0.000014  | -0.028094 |

#### c-DZH\_0

E(RB3LYP) = -2026.60455698

|    |           |           |           |
|----|-----------|-----------|-----------|
| N  | -0.254546 | -0.339150 | 0.181753  |
| C  | -0.173547 | -0.223413 | 1.601039  |
| C  | 1.100099  | -0.252230 | 2.174916  |
| C  | 1.240387  | -0.242905 | 3.558440  |
| C  | 0.109694  | -0.251854 | 4.377077  |
| C  | -1.161799 | -0.274936 | 3.801673  |
| C  | -1.309917 | -0.258059 | 2.418110  |
| H  | 1.967760  | -0.260676 | 1.526387  |
| H  | 2.230601  | -0.241352 | 3.998829  |
| H  | 0.218176  | -0.258392 | 5.455182  |
| H  | -2.042369 | -0.311117 | 4.432578  |
| H  | -2.296759 | -0.289944 | 1.976704  |
| N  | -1.096151 | 0.288233  | -0.500816 |
| C  | -1.851052 | 1.369991  | 0.021462  |
| C  | -3.213023 | 1.420974  | -0.288773 |
| C  | -3.994719 | 2.512463  | 0.073251  |
| C  | -3.390859 | 3.598533  | 0.710589  |
| C  | -2.037439 | 3.581432  | 0.970091  |
| C  | -1.159735 | 2.488903  | 0.648282  |
| Cl | -3.948047 | 0.022308  | -1.062627 |
| Cl | -5.724709 | 2.569165  | -0.236226 |
| H  | -3.990375 | 4.452716  | 0.994966  |
| Cl | -1.319330 | 4.978317  | 1.776351  |
| O  | 0.082227  | 2.498085  | 0.857732  |

#### c-DZH\_1

Energy=-2027.06432261

|   |           |           |           |
|---|-----------|-----------|-----------|
| C | -2.860325 | -0.799000 | 1.207206  |
| C | -3.297212 | 0.413649  | 0.656942  |
| C | -4.433349 | 1.052930  | 1.165402  |
| C | -5.080726 | 0.528745  | 2.277531  |
| C | -4.634330 | -0.665508 | 2.844242  |
| C | -3.539221 | -1.334994 | 2.294439  |
| N | -2.724754 | 1.009504  | -0.500350 |

|    |           |           |           |
|----|-----------|-----------|-----------|
| N  | -1.500430 | 1.029849  | -0.738863 |
| C  | -0.490621 | 0.577527  | 0.172943  |
| C  | -0.246934 | 1.117118  | 1.441699  |
| C  | 0.849502  | 0.663589  | 2.177647  |
| C  | 1.704929  | -0.297460 | 1.650131  |
| C  | 1.489766  | -0.787349 | 0.370197  |
| C  | 0.412353  | -0.339333 | -0.393045 |
| Cl | -1.280064 | 2.368461  | 2.068136  |
| Cl | 1.189397  | 1.292721  | 3.772906  |
| Cl | 2.581657  | -1.973563 | -0.301402 |
| O  | 0.222746  | -0.819088 | -1.640973 |
| H  | 2.546530  | -0.648535 | 2.229919  |
| H  | -0.486647 | -0.308828 | -2.064709 |
| H  | -4.775274 | 1.966621  | 0.695277  |
| H  | -5.941990 | 1.039496  | 2.690295  |
| H  | -5.149223 | -1.084822 | 3.700143  |
| H  | -3.214214 | -2.279562 | 2.713263  |
| H  | -2.024295 | -1.332708 | 0.778400  |

#### c-DZH\_2

Energy= -2027.06380682

|    |           |           |           |
|----|-----------|-----------|-----------|
| C  | 1.637237  | -0.221537 | 1.755415  |
| C  | 1.335121  | -0.848277 | 0.555224  |
| C  | 0.282276  | -0.412474 | -0.249005 |
| Cl | -1.136266 | 2.693439  | 1.877695  |
| Cl | 1.280270  | 1.641634  | 3.679456  |
| H  | 2.459708  | -0.572534 | 2.361860  |
| Cl | 2.277236  | -2.225949 | 0.021807  |
| O  | -0.075378 | -1.003546 | -1.411373 |
| N  | -1.468602 | 1.194687  | -0.740543 |
| H  | 0.533410  | -1.729483 | -1.612709 |
| N  | -2.690784 | 1.137439  | -0.528754 |
| C  | -3.248407 | 0.442039  | 0.588300  |
| C  | -4.280779 | 1.094234  | 1.267445  |
| C  | -4.886793 | 0.473773  | 2.353916  |
| C  | -4.503531 | -0.815748 | 2.725041  |
| C  | -3.512674 | -1.484859 | 2.005792  |
| C  | -2.874644 | -0.859583 | 0.939372  |
| H  | -4.576767 | 2.086984  | 0.951786  |
| H  | -5.667538 | 0.988447  | 2.900539  |
| H  | -4.988984 | -1.305586 | 3.560495  |
| H  | -3.237478 | -2.498135 | 2.272129  |
| H  | -2.128124 | -1.391141 | 0.366266  |

#### c-DZ

E(RB3LYP) = -2026.60258112

|   |           |           |           |
|---|-----------|-----------|-----------|
| C | -0.506725 | 0.688569  | 0.182175  |
| C | -0.194328 | 1.375587  | 1.348424  |
| C | 0.851563  | 0.935624  | 2.165702  |
| C | 1.580176  | -0.189589 | 1.792425  |
| C | 1.268414  | -0.862636 | 0.624349  |
| C | 0.210471  | -0.481875 | -0.258745 |

|    |           |           |           |
|----|-----------|-----------|-----------|
| Cl | -1.102181 | 2.819878  | 1.777953  |
| Cl | 1.287801  | 1.777649  | 3.647998  |
| H  | 2.391002  | -0.535026 | 2.419467  |
| Cl | 2.206889  | -2.297245 | 0.200944  |
| O  | -0.131061 | -1.112913 | -1.305578 |
| N  | -1.466945 | 1.211519  | -0.758623 |
| N  | -2.690316 | 1.156839  | -0.548159 |
| C  | -3.230603 | 0.454270  | 0.581141  |
| C  | -4.198562 | 1.111389  | 1.341231  |
| C  | -4.796272 | 0.452466  | 2.411991  |
| C  | -4.463339 | -0.873203 | 2.691349  |
| C  | -3.528800 | -1.539182 | 1.896391  |
| C  | -2.903849 | -0.880256 | 0.841852  |
| H  | -4.457029 | 2.135667  | 1.101571  |
| H  | -5.530364 | 0.969034  | 3.018855  |
| H  | -4.940429 | -1.390276 | 3.515395  |
| H  | -3.285872 | -2.576027 | 2.097213  |
| H  | -2.190347 | -1.394000 | 0.210086  |

In the attempt to determine the strength of the intramolecular hydrogen bond between the hydroxylic and azo groups, the energy difference between the two conformers shown in Figure S15 has been determined through the computational methodology explained in paragraph 3.6 of the main article.

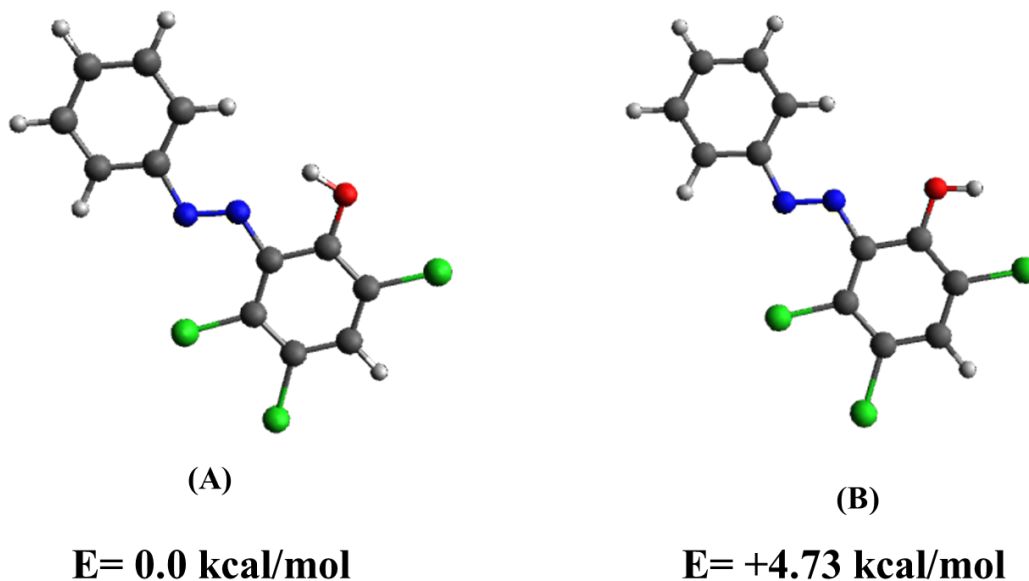

**Figure S15.** The two conformers (A and B) used to determine the strength of the intramolecular hydrogen bond between the hydroxylic and azo groups. The hydrogen bond is present in the conformer A on the left, whereas it is not in the conformer B shown on the right.

Molecular coordinates of the conformer B of Figure S15:

|   |           |           |           |
|---|-----------|-----------|-----------|
| C | -3.559364 | -0.000008 | -2.064191 |
| C | -3.573921 | -0.000005 | -0.659255 |
| C | -4.794543 | 0.000002  | 0.027858  |
| C | -5.994705 | 0.000007  | -0.678494 |
| C | -5.979474 | 0.000004  | -2.072712 |
| C | -4.760101 | -0.000003 | -2.760815 |



|    |           |           |           |
|----|-----------|-----------|-----------|
| N  | -2.418300 | -0.000011 | 0.163722  |
| N  | -1.329607 | -0.000014 | -0.459234 |
| C  | -0.123540 | -0.000006 | 0.266864  |
| C  | 0.088550  | -0.000005 | 1.670867  |
| C  | 1.391258  | 0.000000  | 2.178818  |
| C  | 2.492375  | 0.000006  | 1.329563  |
| C  | 2.296185  | 0.000006  | -0.037729 |
| C  | 1.011242  | 0.000000  | -0.590605 |
| Cl | -1.227660 | -0.000015 | 2.808805  |
| Cl | 1.710354  | 0.000000  | 3.902094  |
| Cl | 3.679273  | 0.000012  | -1.117131 |
| O  | 0.811827  | -0.000001 | -1.921793 |
| H  | 3.493034  | 0.000011  | 1.738408  |
| H  | 1.669034  | 0.000003  | -2.374240 |
| H  | -4.782546 | 0.000004  | 1.111404  |
| H  | -6.937168 | 0.000013  | -0.143655 |
| H  | -6.911770 | 0.000008  | -2.625725 |
| H  | -4.752790 | -0.000006 | -3.844881 |
| H  | -2.612267 | -0.000015 | -2.586890 |

## 6. Photo-induce $\Delta$ pH

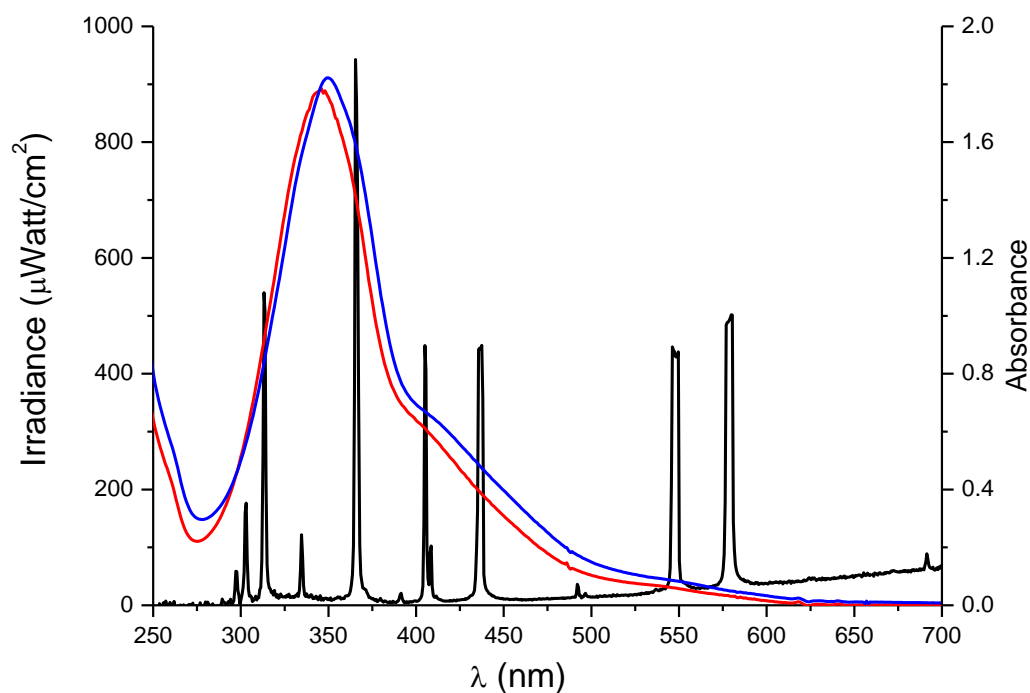

**Figure S16.** Irradiance and spectral profile (in black) emitted by the lamp used to photo-induce the  $\Delta$ pH shown in Figure 8 of the main text. Absorption spectra of  $[t\text{-DZH}] = 1 \times 10^{-4} \text{ M}$  in  $\text{H}_2\text{O}/\text{CH}_3\text{CN} = 1/1$  (red spectrum) and in the micellar aqueous solution with  $[\text{SB3-14}] = 0.1 \text{ M}$  (blue spectrum).

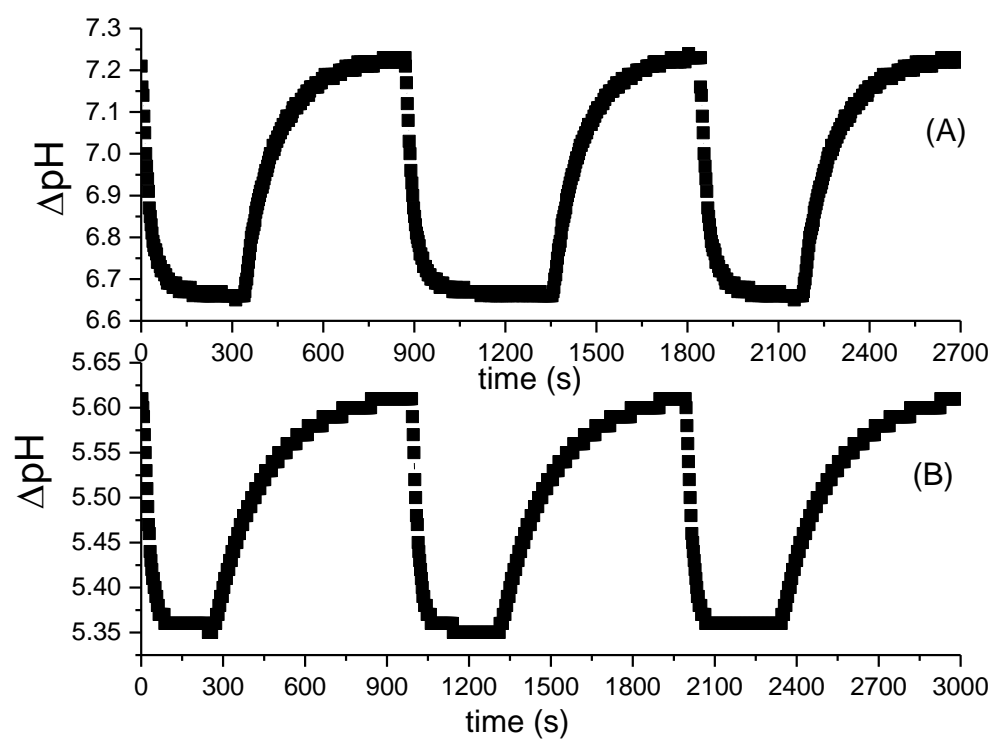

**Figure S17.** Three consecutive  $\Delta\text{pH}$  cycles generated by the irradiation of *t*-DZH in  $\text{H}_2\text{O}/\text{CH}_3\text{CN}=1/1$  (A) and SB3-14 (B).
